# Supplementary material for: Hippocampal Sector–Specific Metabolic Profiles Reflect Endogenous Strategy for Ischemia-Reperfusion Insult Resistance
Source: PubMed Central journal article supplement (PMC7932963; doi:10.1007/s12035-020-02208-6), 2020-11-22
Supplement: 12035_2020_2208_MOESM1_ESM.pdf [file 12035_2020_2208_MOESM1_ESM.pdf]

**Supplementary material to:** Hippocampal sector-specific metabolic profiles reflect endogenous strategy for ischemia-reperfusion insult resistance

Olga Krupska<sup>1,3,a</sup>, Tomasz Kowalczyk<sup>2,a</sup>, Małgorzata Beręsewicz-Haller<sup>1</sup>, Paulina Samczuk<sup>2</sup>, Karolina Pietrowska<sup>2</sup>, Krzysztof Zabłocki<sup>3</sup>, Adam Kretowski<sup>2</sup>, Michał Ciborowski<sup>2\*</sup> and Barbara Zabłocka<sup>1\*</sup>

<sup>1</sup>Molecular Biology Unit, Mossakowski Medical Research Centre PAS Warsaw, Poland; [okrupska@imdik.pan.pl](mailto:okrupska@imdik.pan.pl); [mberesewicz@imdik.pan.pl](mailto:mberesewicz@imdik.pan.pl); [bzablocka@imdik.pan.pl](mailto:bzablocka@imdik.pan.pl)

<sup>2</sup>Metabolomics Laboratory, Clinical Research Centre, Medical University of Białystok, Poland; [tomasz.kowalczyk@umb.edu.pl](mailto:tomasz.kowalczyk@umb.edu.pl); [paulina.samczuk@gmail.com](mailto:paulina.samczuk@gmail.com); [adamkretowski@wp.pl](mailto:adamkretowski@wp.pl); [michal.ciborowski@umb.edu.pl](mailto:michal.ciborowski@umb.edu.pl); [karolina.pietrowska@umb.edu.pl](mailto:karolina.pietrowska@umb.edu.pl)

<sup>3</sup>Laboratory of Cellular Metabolism, Department of Biochemistry, Nencki Institute of Experimental Biology, Warsaw, Poland, [k.zablocki@nencki.edu.pl](mailto:k.zablocki@nencki.edu.pl); [o.krupska@nencki.edu.pl](mailto:o.krupska@nencki.edu.pl)

\* Correspondence: [bzablocka@imdik.pan.pl](mailto:bzablocka@imdik.pan.pl); Tel.: (48) 22 60 86 486 (BZ); [michal.ciborowski@umb.edu.pl](mailto:michal.ciborowski@umb.edu.pl); Tel.: (48) 85 831 81 51 (MC)

<sup>a</sup> equal contribution

Figure S1. PCA plots showing clustering of the QC samples.

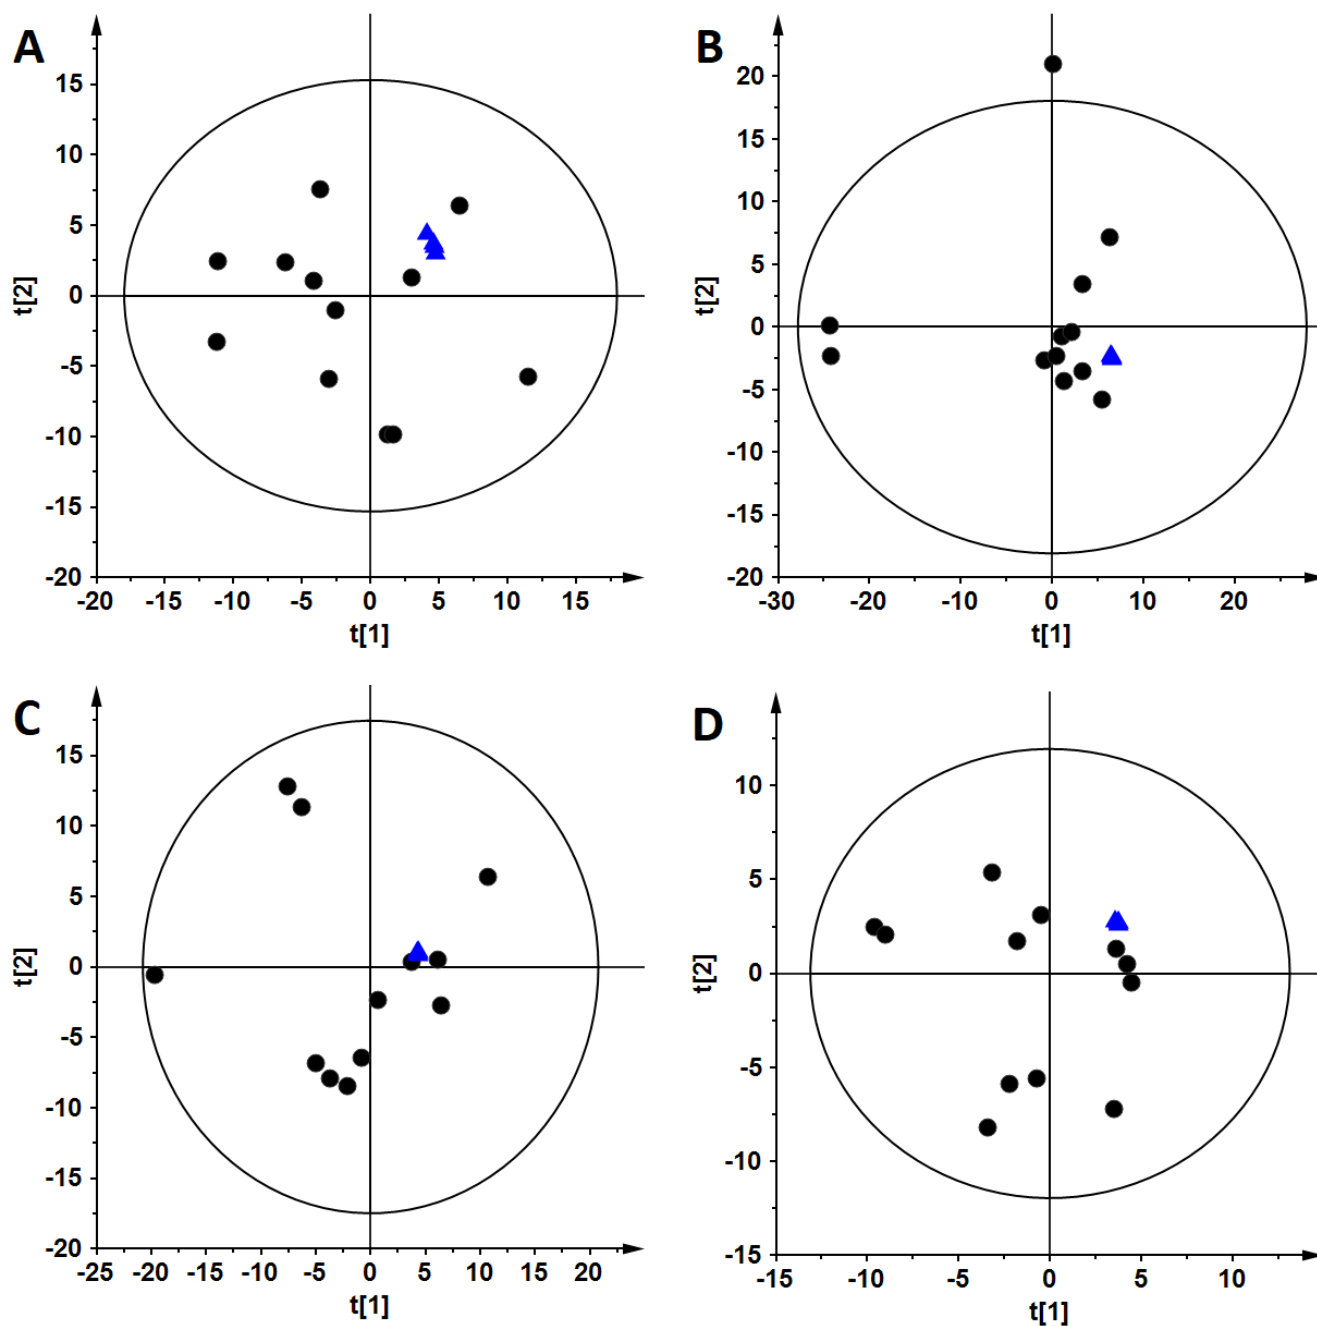

All data were log transformed and Ctr scaled. Panel A – RP(+) data,  $R^2=0.555$ ; Panel B – RP(-),  $R^2=0.418$ ; Panel C – HILIC(+),  $R^2=0.487$ ; Panel D – HILIC(-),  $R^2=0.355$ . ● - biological samples, ▲ - QC samples.

Figure S2. Partial least square discriminant analysis plots showing discrimination between the studied hippocampal regions based on RP(-) data.

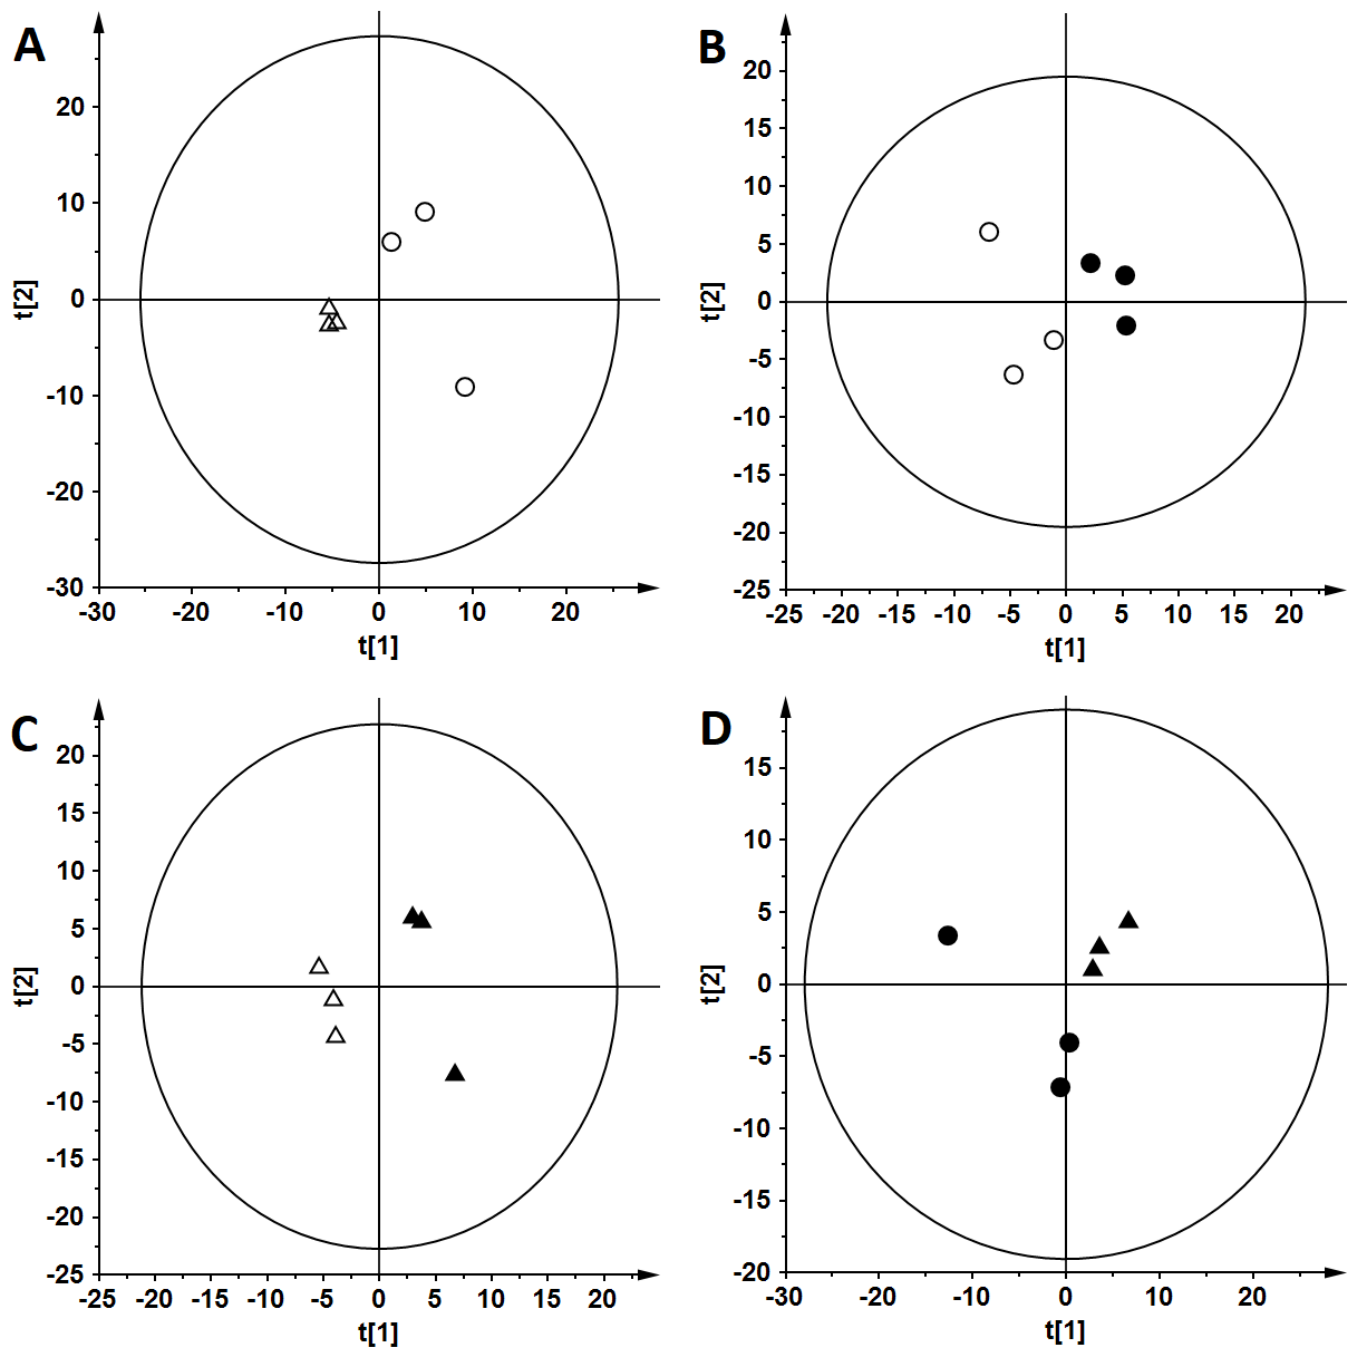

Data were log transformed and Par scaled. ○ - C\_CA1; △ - C\_CA2-4,DG; ● - IR\_CA1; ▲ - IR\_CA2-4,DG. Panel A: C\_CA1 vs C\_CA2-4,DG;  $R^2=0.946$ ,  $Q^2=0.533$ . Panel B: C\_CA1 vs IR\_CA1;  $R^2=0.979$ ,  $Q^2=0.390$ . Panel C: C\_CA2-4,DG vs IR\_CA2-4,DG;  $R^2=0.996$ ,  $Q^2=0.824$ . Panel D: IR\_CA1 vs IR\_CA2-4,DG;  $R^2=0.883$ ,  $Q^2=0.439$ .

Figure S3. Partial least square discriminant analysis plots showing discrimination between the studied hippocampal regions based on HILIC(+) data.

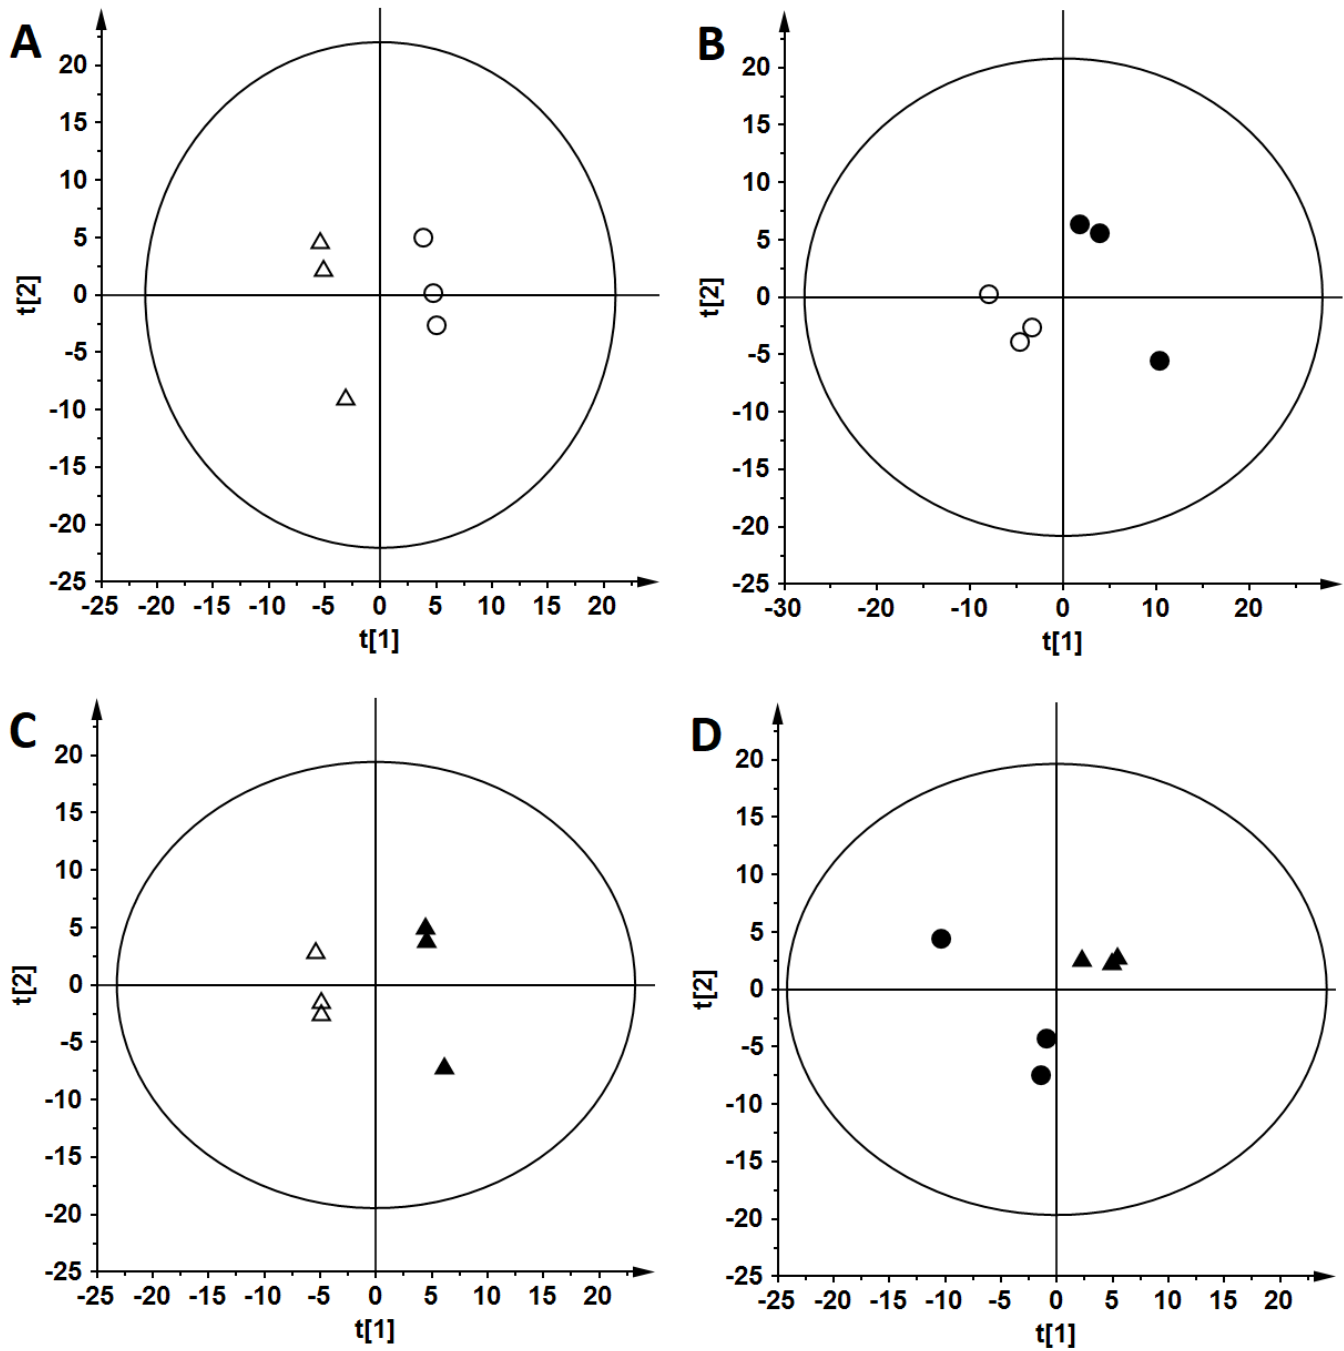

Data were log transformed and Par scaled. ○ - C\_CA1; △ - C\_CA2-4,DG; ● - IR\_CA1; ▲ - IR\_CA2-4,DG. Panel A: C\_CA1 vs C\_CA2-4,DG;  $R^2=1.000$ ,  $Q^2=0.781$ . Panel B: C\_CA1 vs IR\_CA1;  $R^2=0.981$ ,  $Q^2=0.813$ . Panel C: C\_CA2-4,DG vs IR\_CA2-4,DG;  $R^2=1.000$ ,  $Q^2=0.883$ . Panel D: IR\_CA1 vs IR\_CA2-4,DG;  $R^2=0.956$ ,  $Q^2=0.650$ .

Figure S4. Partial least square discriminant analysis plots showing discrimination between the studied hippocampal regions based on HILIC(-) data.

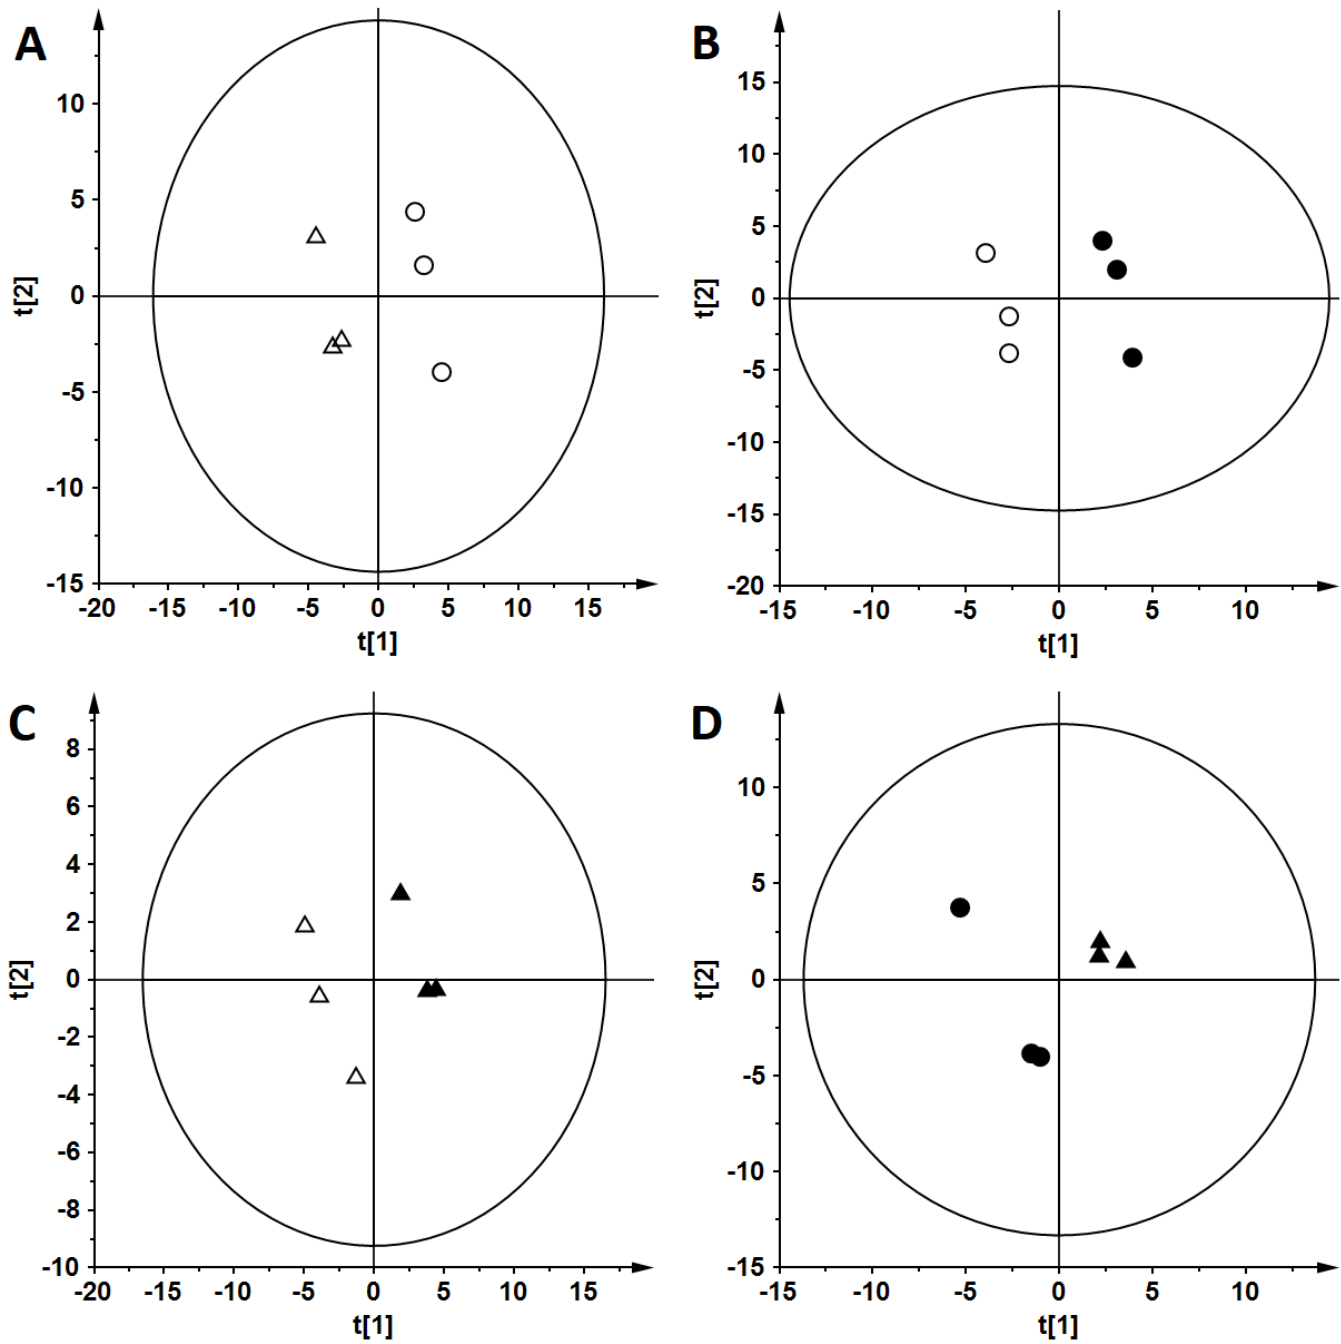

Data were log transformed and Par scaled. ○ - C\_CA1; △ - C\_CA2-4,DG; ● - IR\_CA1; ▲ - IR\_CA2-4,DG. Panel A: C\_CA1 vs C\_CA2-4,DG;  $R^2=0.997$ ,  $Q^2=0.889$ . Panel B: C\_CA1 vs IR\_CA1;  $R^2=0.997$ ,  $Q^2=0.763$ . Panel C: C\_CA2-4,DG vs IR\_CA2-4,DG;  $R^2=0.995$ ,  $Q^2=0.595$ . Panel D: IR\_CA1 vs IR\_CA2-4,DG;  $R^2=0.986$ ,  $Q^2=0.710$ .

Table S1.

| Name                        | Experimental neutral mass [Da] | RT [min] | Error [ppm] | Experimental mass [Da] | Fragments                                                                               | Adduct | Chromatography (ion mode) |
|-----------------------------|--------------------------------|----------|-------------|------------------------|-----------------------------------------------------------------------------------------|--------|---------------------------|
| Piperidine                  | 85.08919                       | 3.97     | 0           | 86.0957                | 41.0381, 42.0326, 43.0532, 44.0490, 56.0487, 57.0571, 58.0632, 69.0694, 70.0628         | M+H    | HILIC (pos)               |
| Hydroxypyridine             | 95.0373                        | 3.28     | 2           | 96.0437                | 51.0229, 78.0325                                                                        | M+H    | HILIC (pos)               |
| Indole                      | 117.0577                       | 0.64     | 1           | 118.0843               | 91.0527                                                                                 | M+H    | C8 (pos)                  |
| Taurine                     | 125.015                        | 0.59     | 3           | 126.0221               | 108.0107                                                                                | M+H    | C8 (pos)                  |
| Pipecolic acid              | 129.0795                       | 6.67     | 4           | 130.1590               | 84.0810                                                                                 | M+H    | HILIC (pos)               |
| Leucine                     | 131.0951                       | 3.95     | 4           | 132.1016               | 44.0499, 69.0707, 86.0966                                                               | M+H    | HILIC (pos)               |
| Histidine                   | 155.0702                       | 6.42     | 5           | 156.0766               | 83.0606, 95.0605, 110.0714                                                              | M+H    | HILIC (pos)               |
| Phenylalanine               | 165.0791                       | 3.70     | 1           | 164.0723               | 72.0085, 103.0545, 147.0443                                                             | M+H    | HILIC (neg)               |
| 3-Methylhistidine           | 169.086                        | 7.58     | 5           | 170.0929               | 96.0686, 109.0754, 124.0863                                                             | M+H    | HILIC (pos)               |
| Citric acid                 | 192.0267                       | 2.66     | 2           | 191.0192               | 43.0199, 57.0349, 71.0133, 85.0292, 87.0087, 111.0084, 129.0194                         | M-H    | HILIC (neg)               |
| Tryptophan                  | 204.0905                       | 0.65     | 3           | 205.0978               | 118.0636, 146.0595, 59.0922, 188.0701                                                   | M+H    | C8 (pos)                  |
| Carnosine                   | 226.108                        | 7.53     | 6           | 227.1127               | 95.0611, 110.0713, 122.0712, 138.0650, 156.0766, 164.0822, 181.1076, 198.0855, 210.0871 | M+H    | HILIC (pos)               |
| Adenosine                   | 267.098                        | 1.59     | 5           | 268.1588               | 136.0617                                                                                | M+H    | HILIC (pos)               |
| Acetylaspartylglutamic acid | 304.0909                       | 0.64     | 1           | 303.0545               | 58.0302, 96.0086, 102.0559, 128.0351, 146.0456, 155.0453, 182.0455, 226.0358, 285.0747  | M-H    | C8 (neg)                  |
| Guanosine monophosphate     | 363.0579                       | 0.62     | 0           | 362.0499               | 78.9591, 96.9686, 150.0405, 211.0002                                                    | M-H    | C8 (neg)                  |
| Stearoylcarnitine           | 427.3669                       | 7.91     | 2           | 428.3729               | 60.0808, 85.0282, 144.10.11, 267.2670, 369.2290                                         | M+H    | C8 (pos)                  |
| Arachidonoylcarnitine       | 447.3351                       | 6.70     | 1           | 448.3425               | 60.0813, 85.0281, 144.1022                                                              | M+H    | C8 (pos)                  |
| Eicoseneoylcarnitine        | 453.3814                       | 8.15     | 1           | 454.3897               | 60.0813, 85.0285, 144.1024, 297.2019                                                    | M+H    | C8 (pos)                  |
| Lyso PE 18:1 sn-1           | 479.3014                       | 7.82     | 0           | 480.3443               | 339.2885, 465.2962                                                                      | M+H    | C8 (pos)                  |

|                   |          |       |   |          |                                                                  |                |          |
|-------------------|----------|-------|---|----------|------------------------------------------------------------------|----------------|----------|
| Lyso PE 20:4 sn-1 | 501.2859 | 7.15  | 1 | 502.2893 | 361.2735, 459.2461, 484.2753                                     | M+H            | C8 (pos) |
| Lyso PG 18:1 sn-1 | 510.2947 | 9.48  | 2 | 509.2893 | 152.9950, 245.0397, 281.2473                                     | M-H            | C8 (neg) |
| Lyso PE 22:6 sn-1 | 525.2861 | 7.12  | 1 | 526.2934 | 385.2735                                                         | M+H            | C8 (pos) |
| Lyso PI 18:1 sn-1 | 598.3112 | 8.79  | 1 | 597.3041 | 78.9582, 152.9945, 241.0111,<br>281.2474, 315.0472               | M-H            | C8 (neg) |
| Lyso PI 18:0 sn-1 | 600.3266 | 10.26 | 1 | 599.3199 | 78.9587, 152.9950, 241.0108,<br>283.2632, 315.0469               | M-H            | C8 (neg) |
| PE 22:6/P-16:0    | 747.52   | 14.85 | 0 | 746.5133 | 196.0383, 283.2440,<br>327.2334, 436.2832                        | M-H            | C8 (neg) |
| PE 16:1/22:6      | 761.5004 | 13.34 | 1 | 760.4887 | 140.0099, 196.0385,<br>253.2150, 327.2312, 450.2606              | M-H            | C8 (neg) |
| PE 16:1/16:0      | 777.5538 | 13.41 | 2 | 776.5515 | 168.0435, 253.2178,<br>255.2335, 480.3090, 716.5235              | M+FA-H         | C8 (neg) |
| PE 22:6/18:1      | 789.5306 | 14.47 | 0 | 788.5232 | 140.0118, 196.0370,<br>281.2485, 327.2324, 478.2927              | M-H            | C8 (neg) |
| PC 18:1/18:1      | 831.5989 | 13.75 | 0 | 830.5917 | 168.0400, 224.0600,<br>281.2488, 770.5705                        | M+FA-H         | C8 (neg) |
| PE 20:4/22:6      | 879.5058 | 13.39 | 4 | 879.5058 | 140.0103, 196.0370,<br>303.2329, 327.2323,<br>500.2762, 810.5075 | M-<br>H+HCOONa | C8 (neg) |
